# Supplementary material
Source: PubMed Central journal article supplement (PMC4286427)
Supplement: NIHMS649879-supplement-Supplementary_Figures_and_Table.pdf [file NIHMS649879-supplement-Supplementary_Figures_and_Table.pdf]

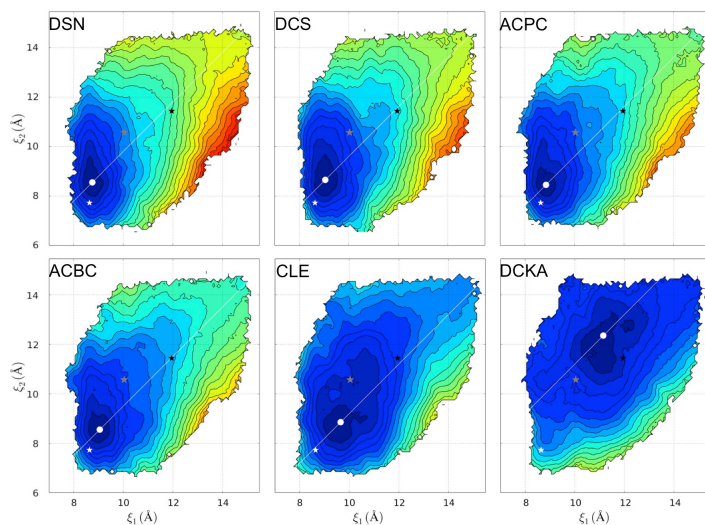

**Figure S1, related to Figure 3.** Free energy surfaces of the GluN1 LBD bound with six non-Gly ligands. The free energy minima are highlighted by a white dot for each indicated ligand. Also shown are  $(\zeta_{1c}, \zeta_{2c})$  values calculated on the crystal structures of the LBD bound with three ligands: Gly (white star; PDB 1PB7), CLE (gray star; PDB 1Y1M), and DCKA (black star; PDB 1PBQ). The  $\zeta_1'$  coordinate with  $\zeta_2'$  fixed at  $(\zeta_{1m} - \zeta_{2m})/2$  is shown by a white line.

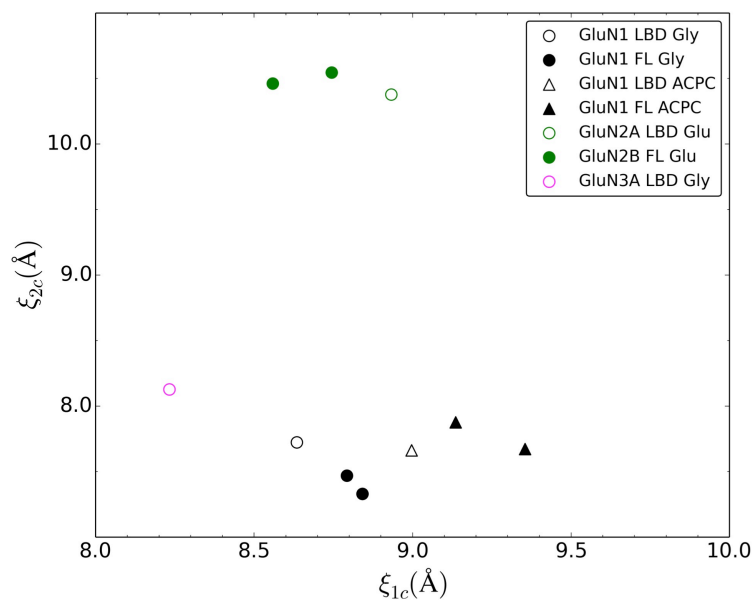

**Figure S2, related to Figure 5.** Values of ( $\xi_{1c}$ ,  $\xi_{2c}$ ) in crystal structures of isolated GluN1-3 LBDs or full-length (FL) NMDA receptors bound with Gly, ACPC, and glutamate (Glu).

**Table S1**

| Ligand | PDB entry | $(\zeta_{1m}, \zeta_{2m})$<br>(Å) | $(\zeta_{1c}, \zeta_{2c})$<br>(Å) | $d$<br>(Å) | $\Delta W_c$<br>(kcal/mol) |
|--------|-----------|-----------------------------------|-----------------------------------|------------|----------------------------|
| Gly    | 1PB7      | (8.65, 8.45)                      | (8.64, 7.72)                      | 0.73       | 1.96                       |
| DSN    | 1PB8      | (8.75, 8.55)                      | (8.72, 7.74)                      | 0.81       | 1.90                       |
| DCS    | 1PB9      | (9.05, 8.65)                      | (8.79, 7.70)                      | 0.99       | 2.61                       |
| ACPC   | 1Y20      | (8.85, 8.45)                      | (9.00, 7.66)                      | 0.80       | 2.03                       |
| ACBC   | 1Y1Z      | (9.05, 8.55)                      | (9.10, 7.75)                      | 0.80       | 2.28                       |
| CLE    | 1Y1M      | (9.65, 8.85)                      | (10.00, 10.57)                    | 1.76       | 1.97                       |
| DCKA   | 1PBQ      | (11.15, 12.35)                    | (12.00, 11.44)                    | 1.22       | 1.93                       |

**Table S1, related to Figures 2B & S1.** Comparison of computed free-energy minimum positions and the counterparts in the crystal structures of the GluN1 LBD bound with seven ligands.

$d$ : distance between  $(\zeta_{1m}, \zeta_{2m})$  and  $(\zeta_{1c}, \zeta_{2c})$ .

$\Delta W_c$ : increase in free energy from  $(\zeta_{1m}, \zeta_{2m})$  to  $(\zeta_{1c}, \zeta_{2c})$ .
